# Supplementary material
Source: ML conference proceedings conference paper supplement (https://openreview.net/forum?id=koG76YqOwo)

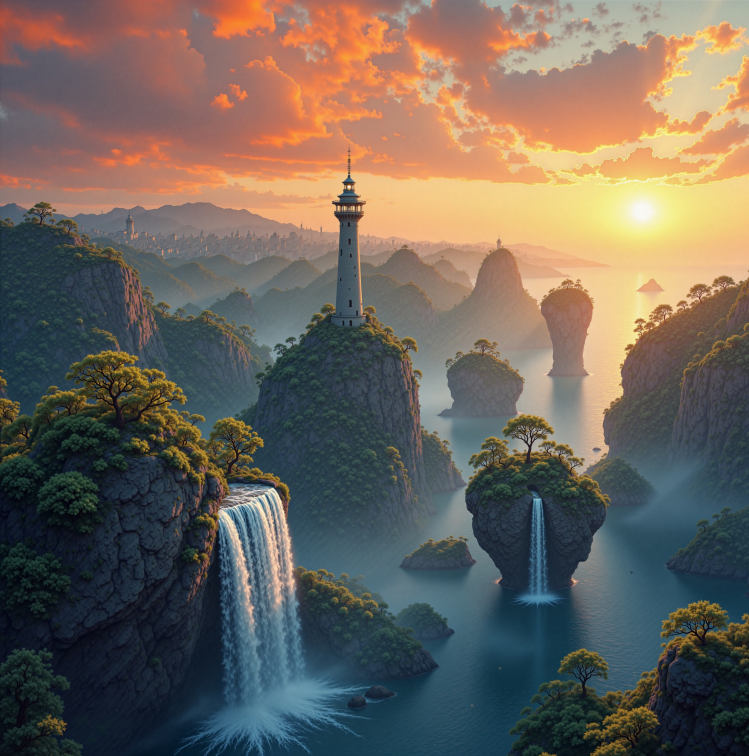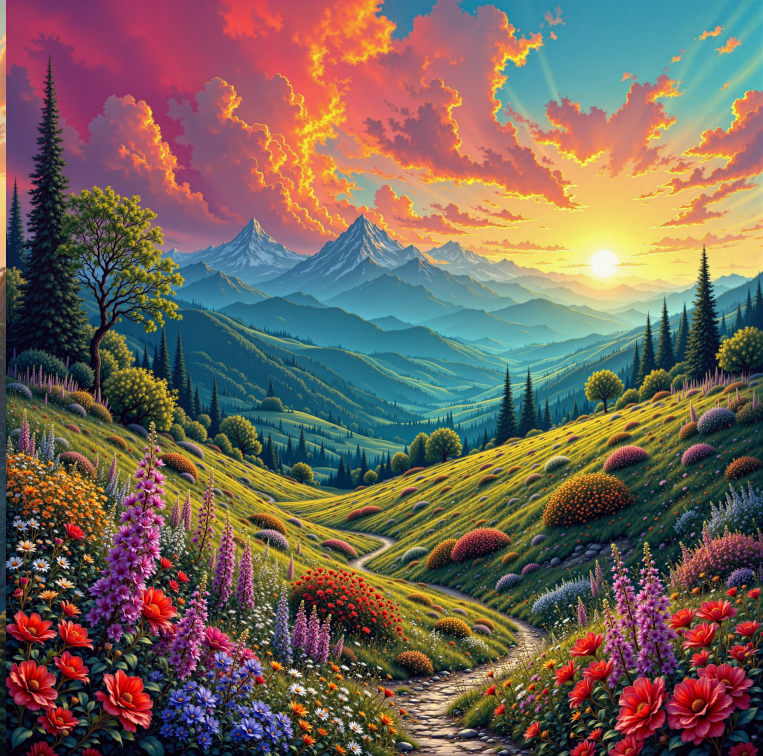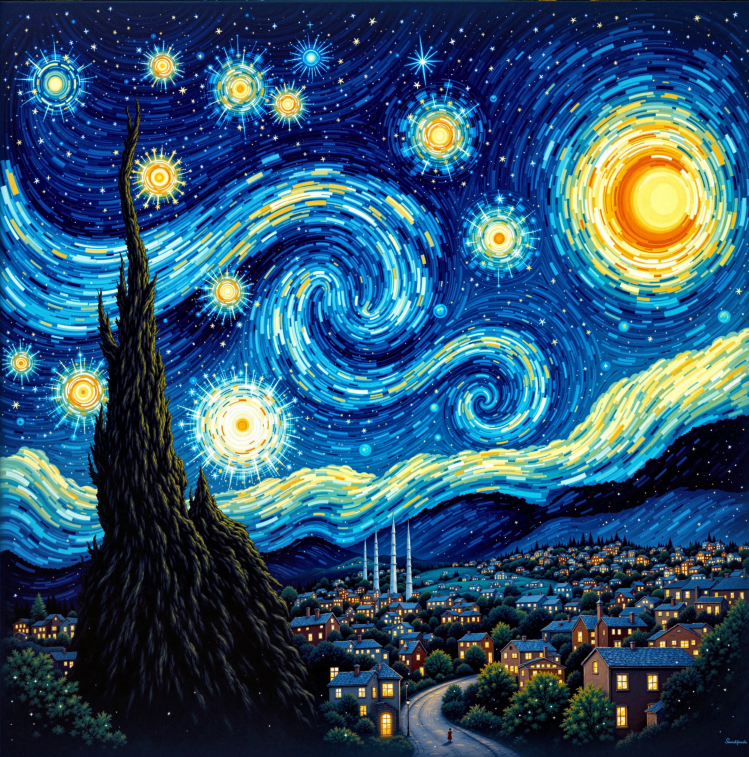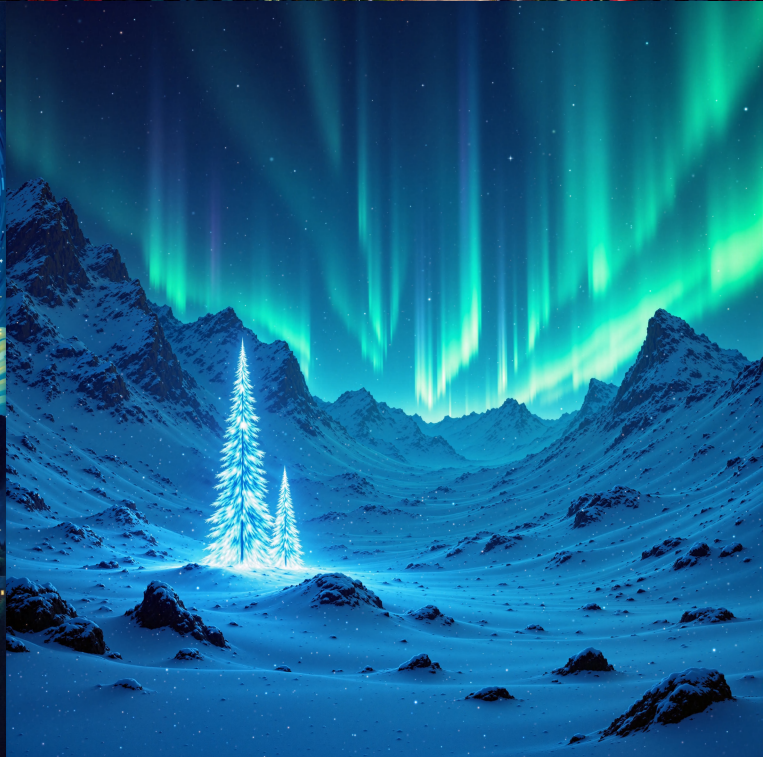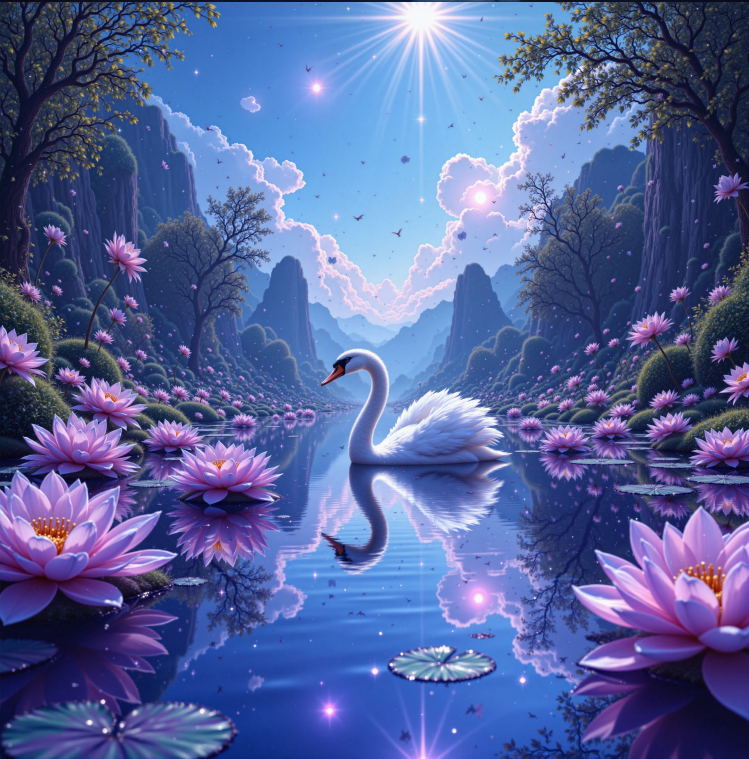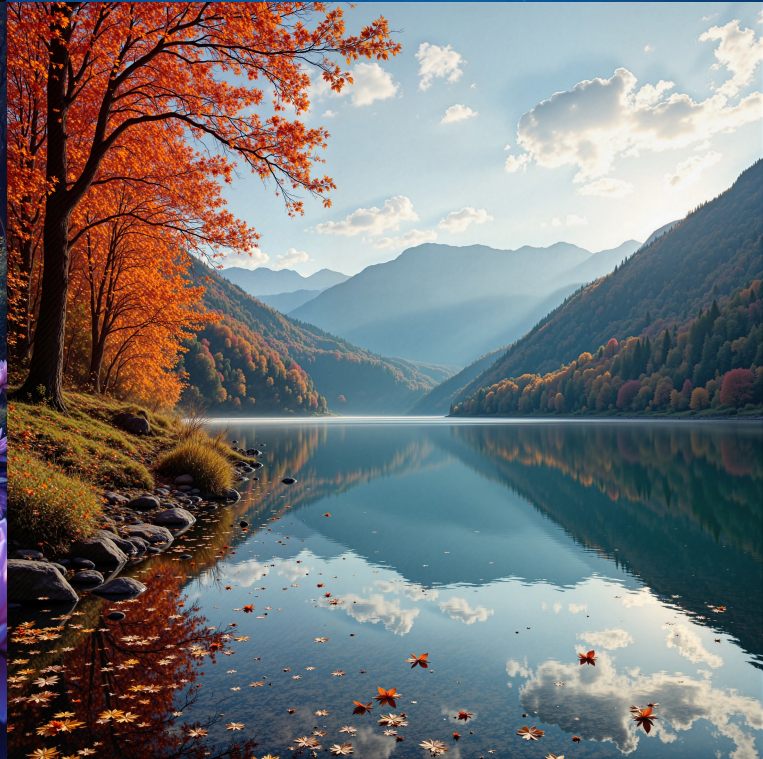

Supplement: supplementary_material [file hiflow_4K_1.pdf › additional_high_resolution_images/hiflow_4K_1.pdf]

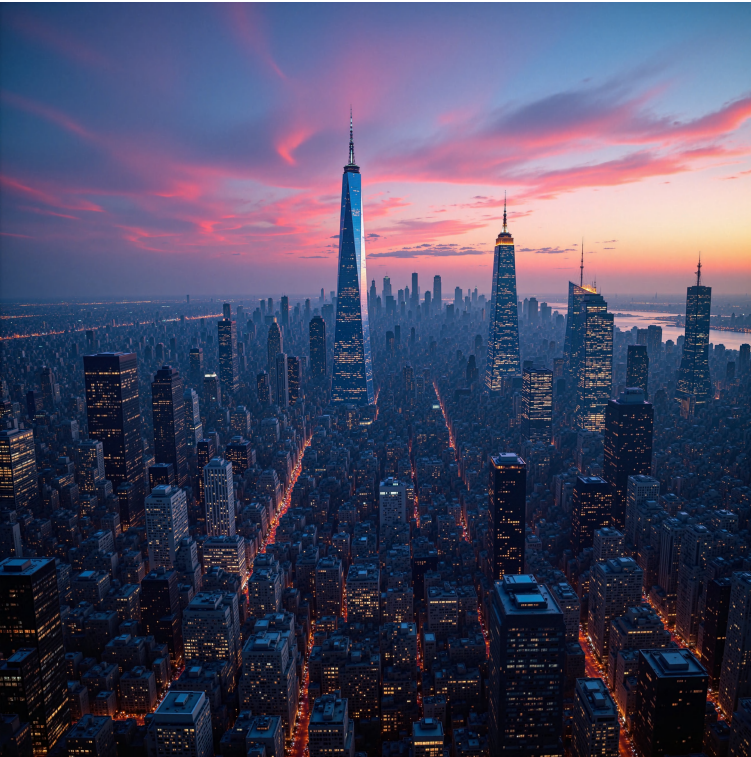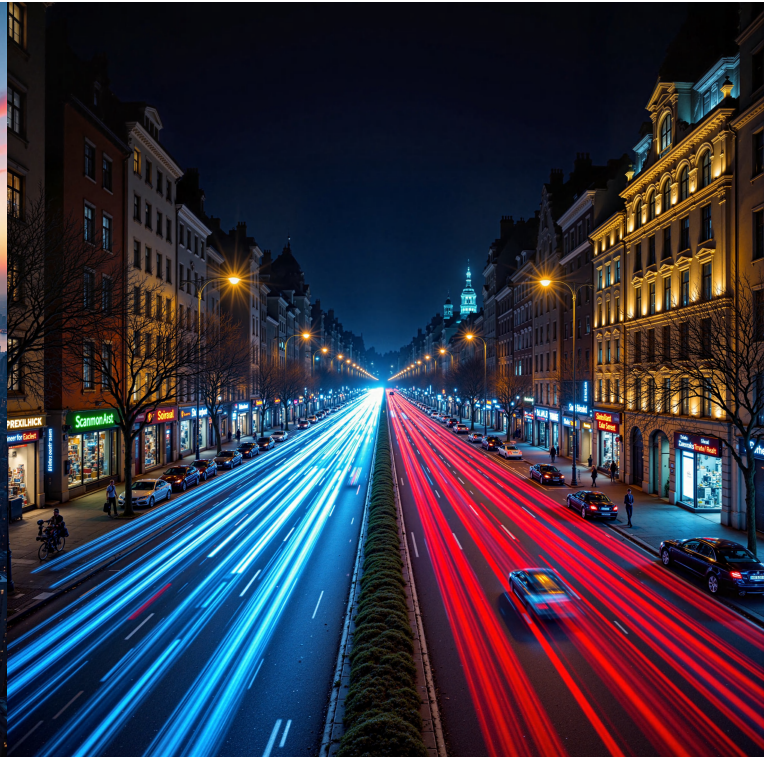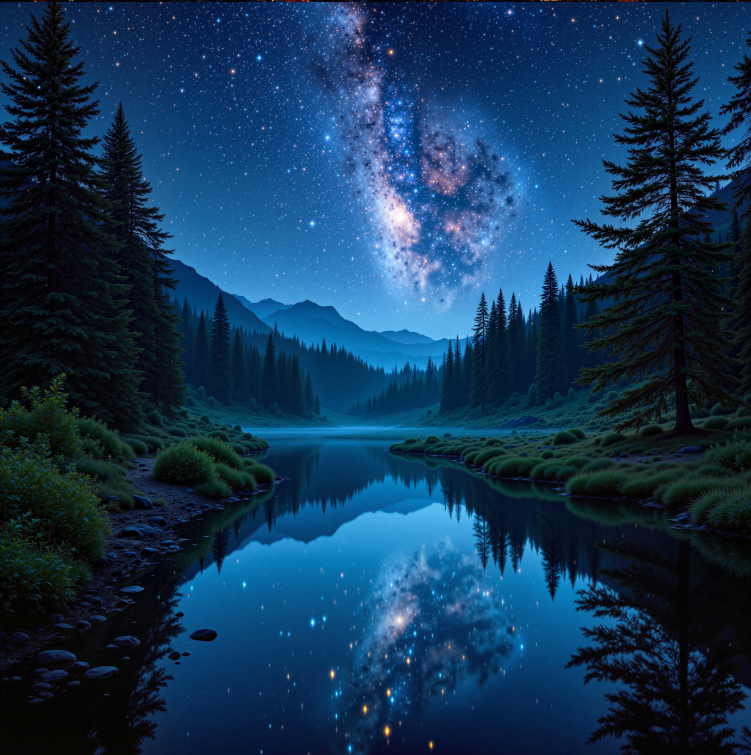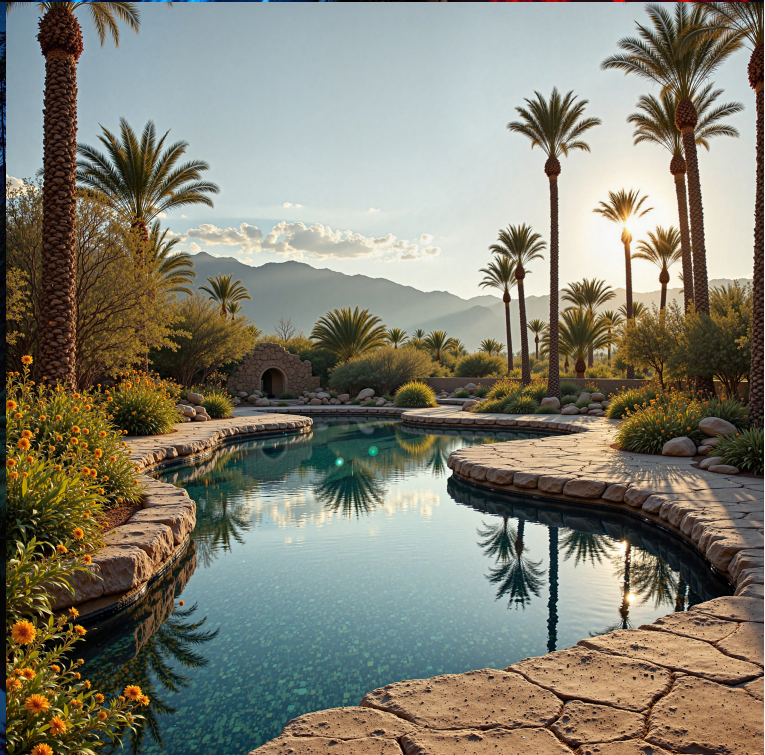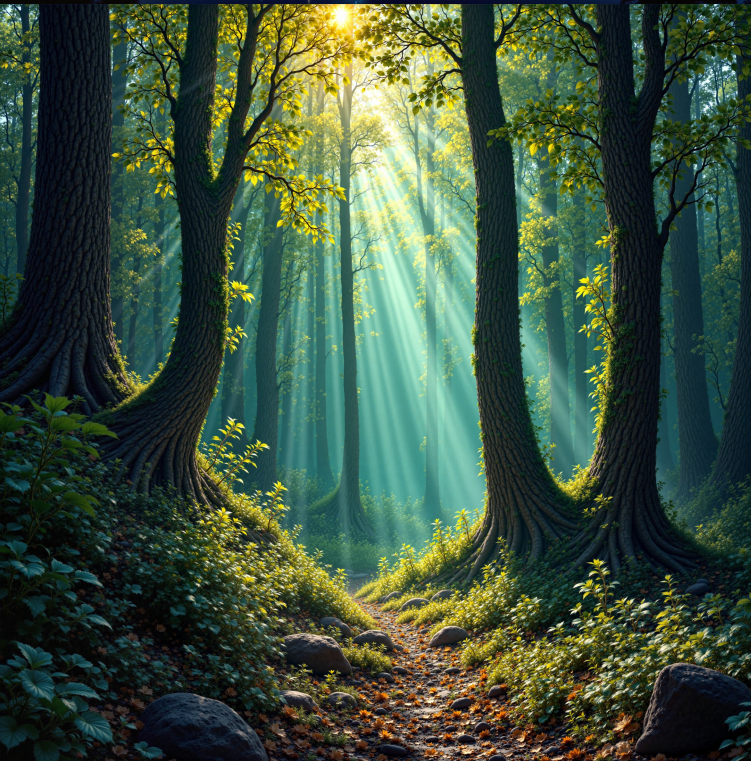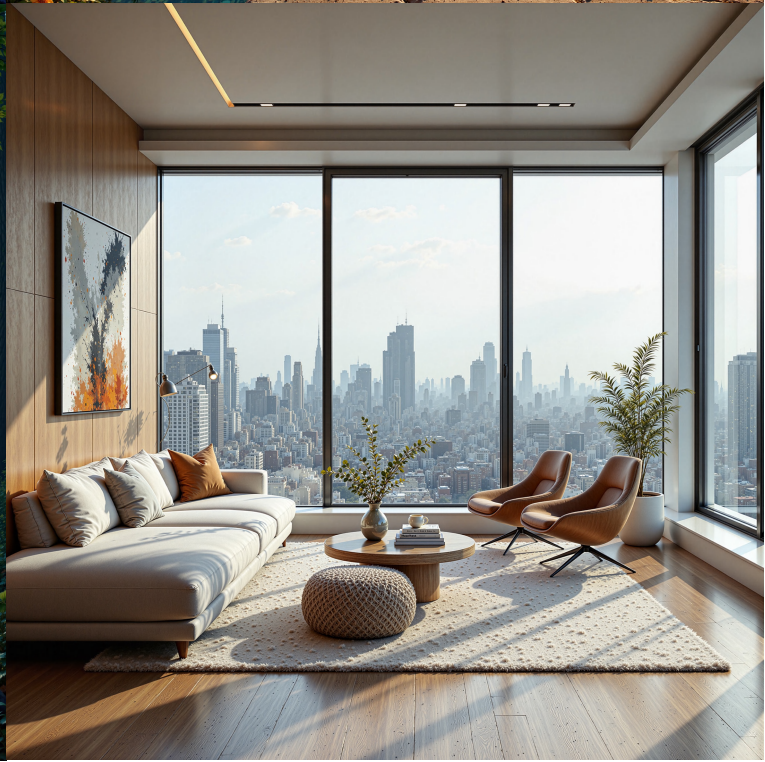

Supplement: supplementary_material [file hiflow_4K_2.pdf › additional_high_resolution_images/hiflow_4K_2.pdf]

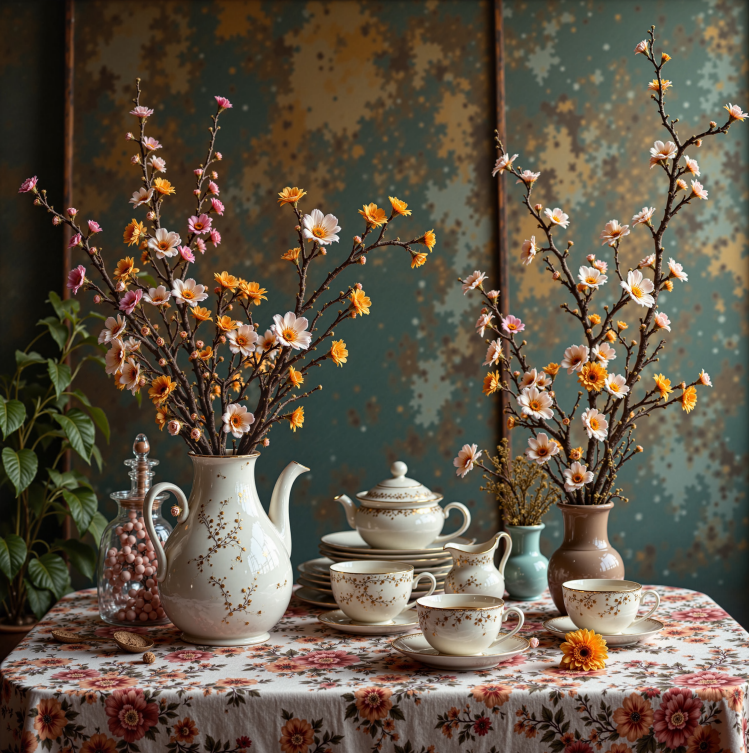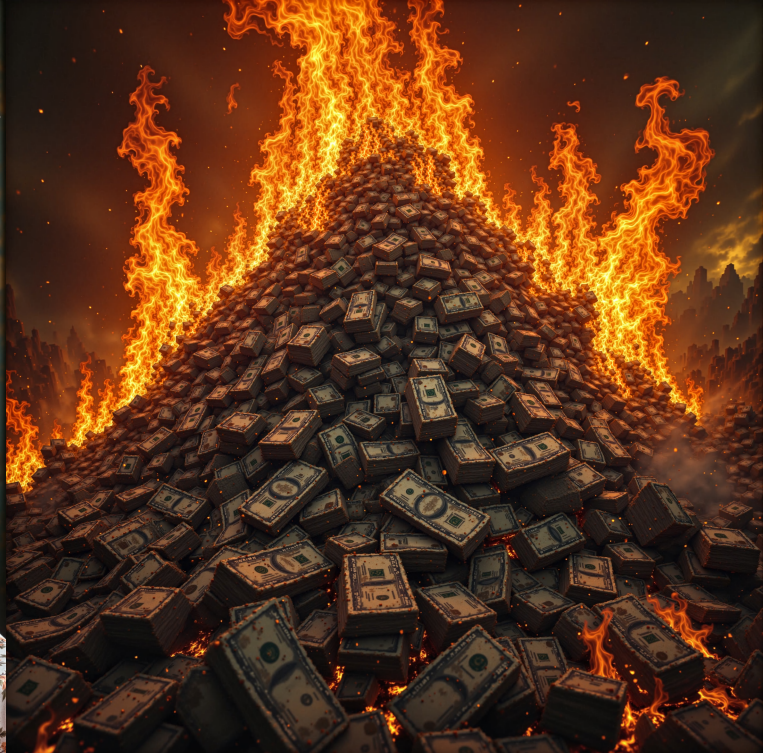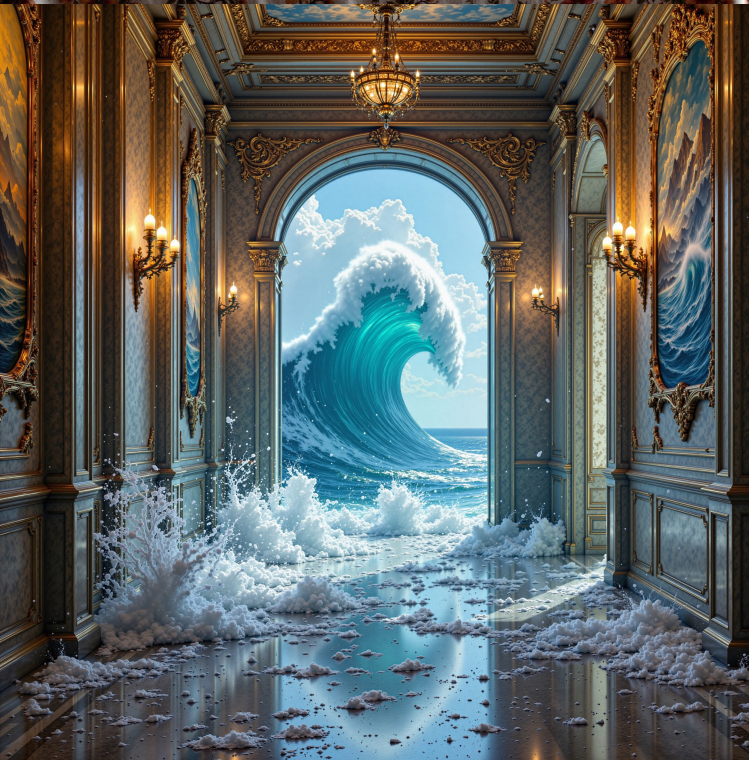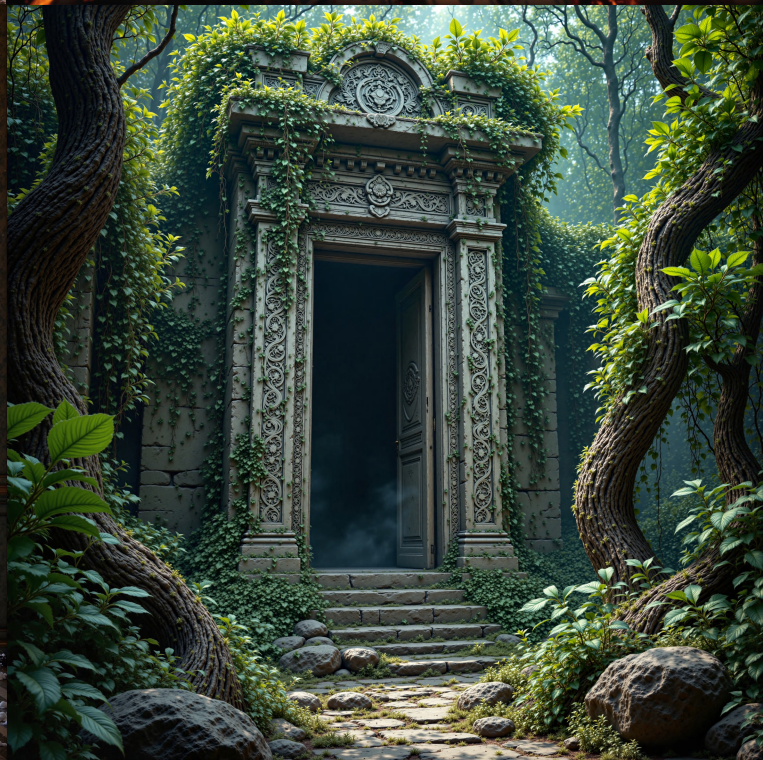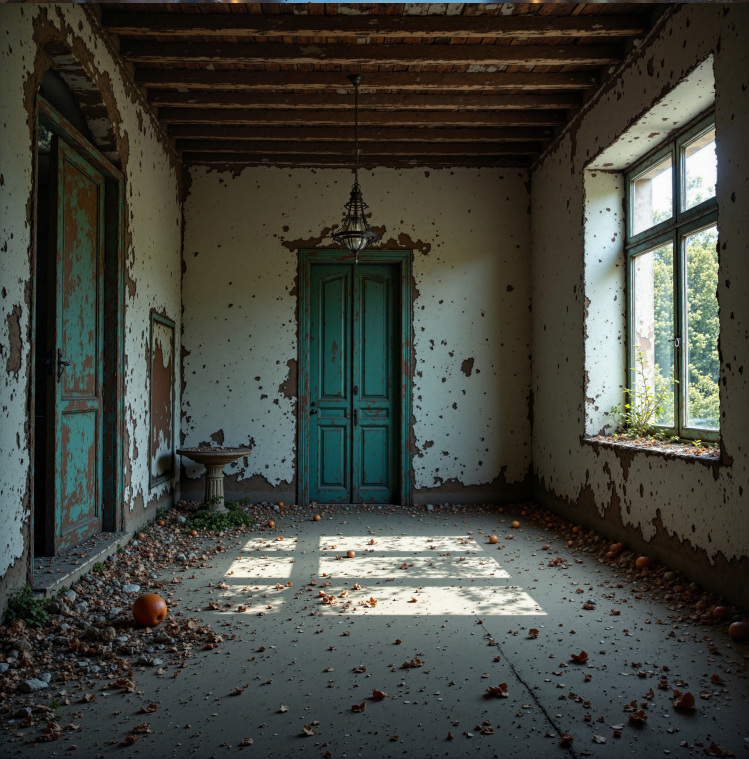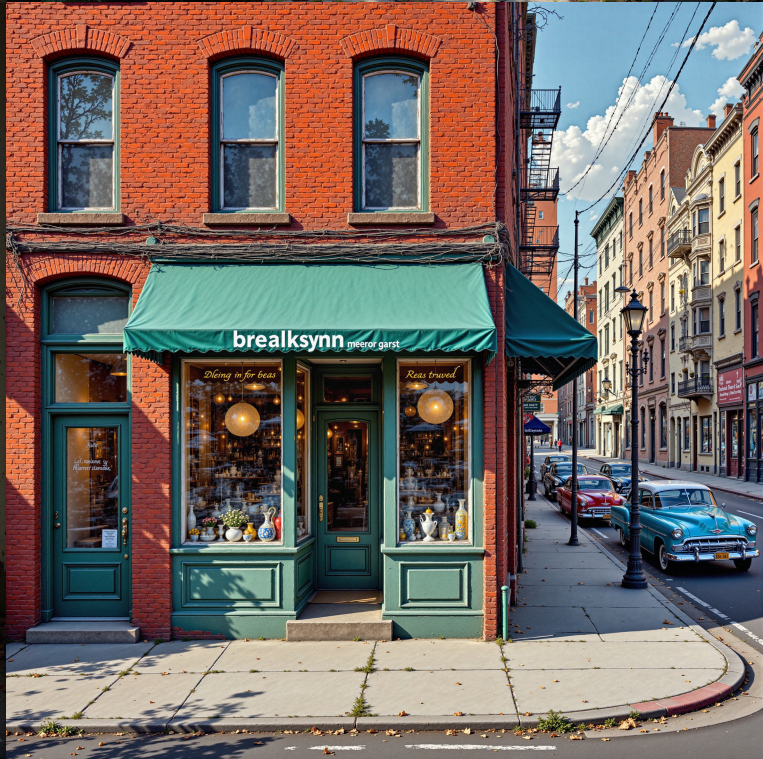

Supplement: supplementary_material [file hiflow_4K_3.pdf › additional_high_resolution_images/hiflow_4K_3.pdf]

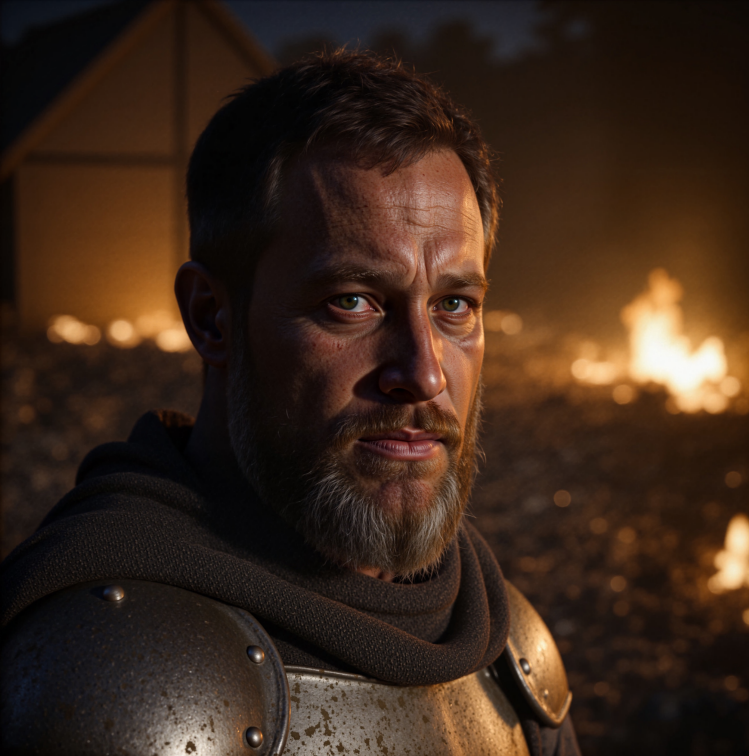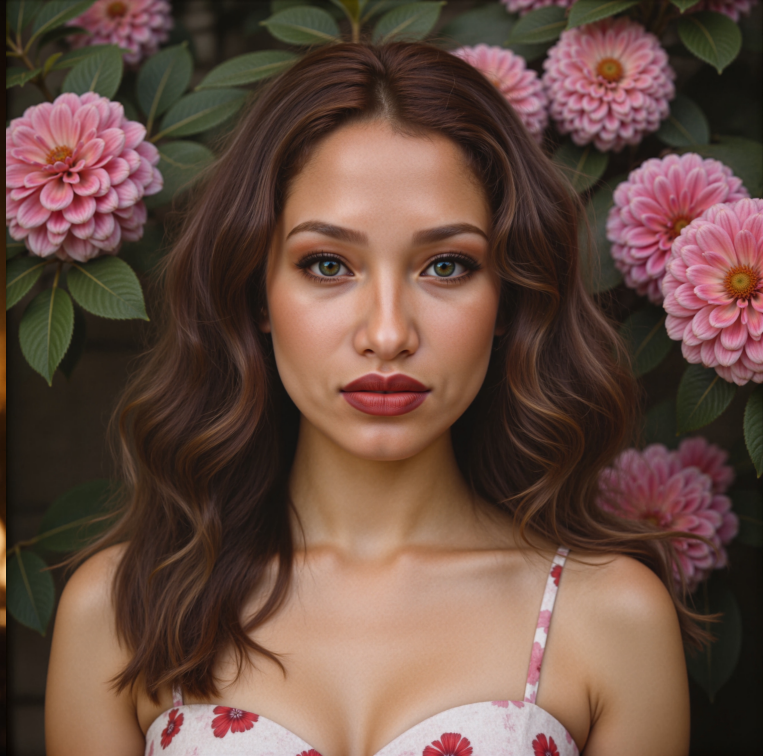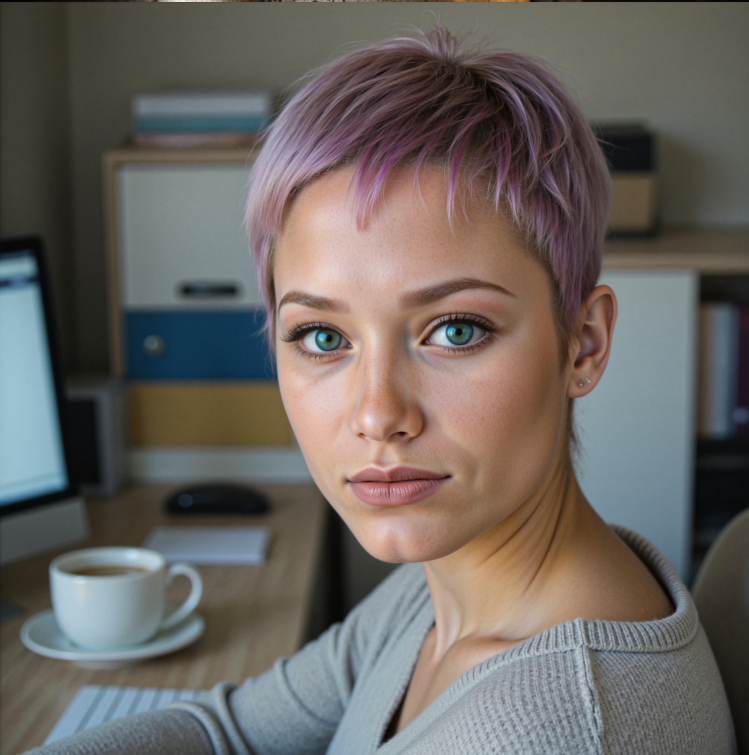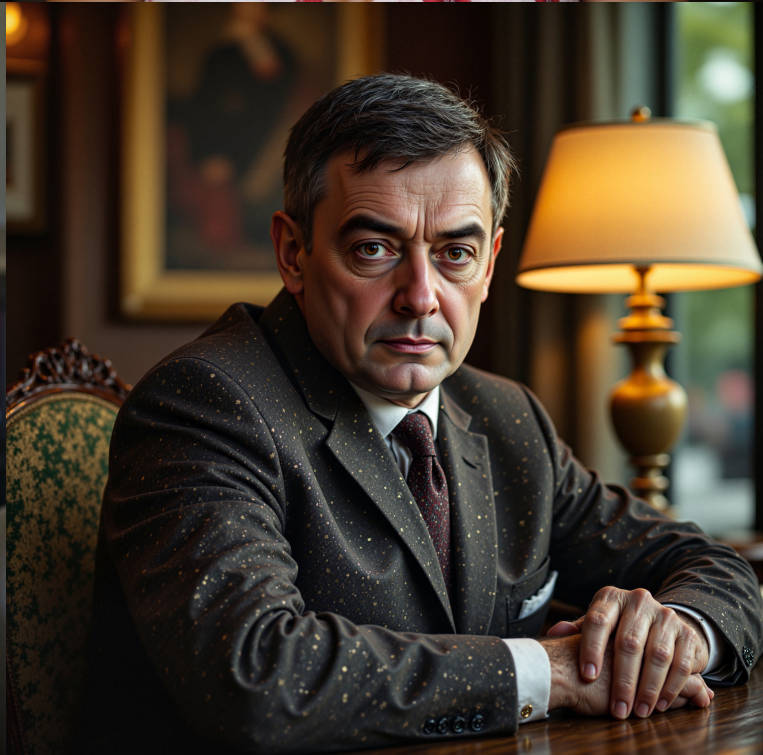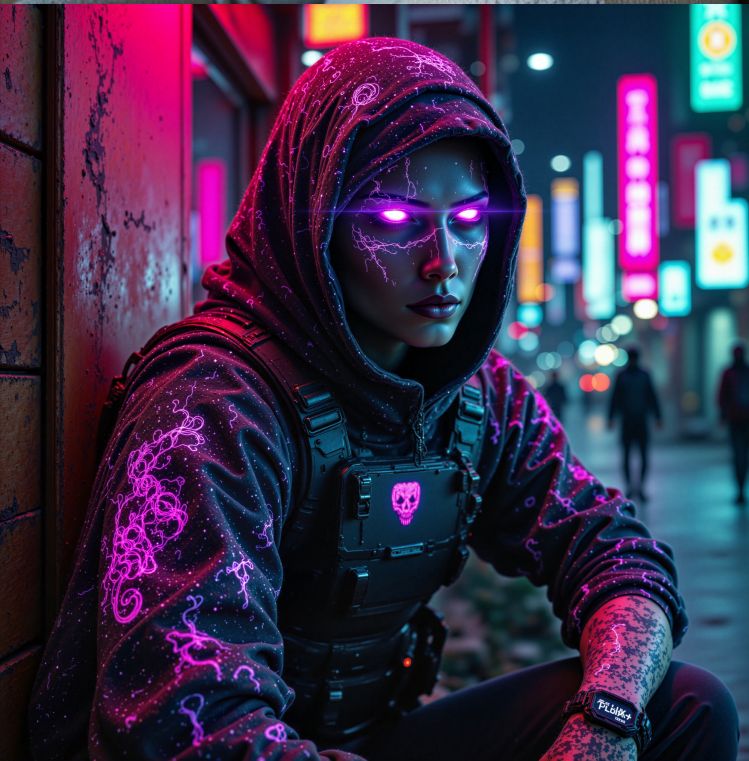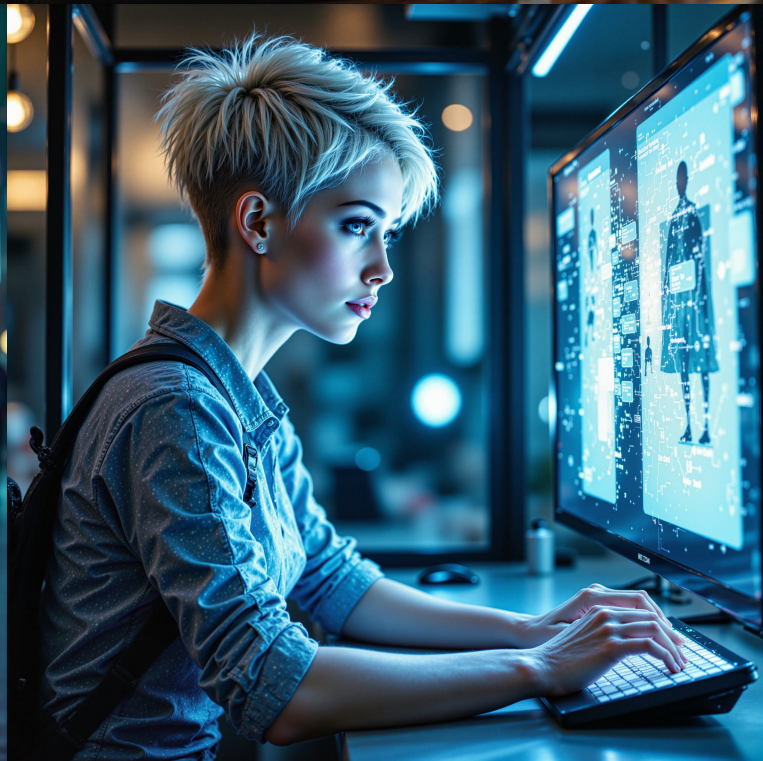

Supplement: supplementary_material [file hiflow_4K_4.pdf › additional_high_resolution_images/hiflow_4K_4.pdf]

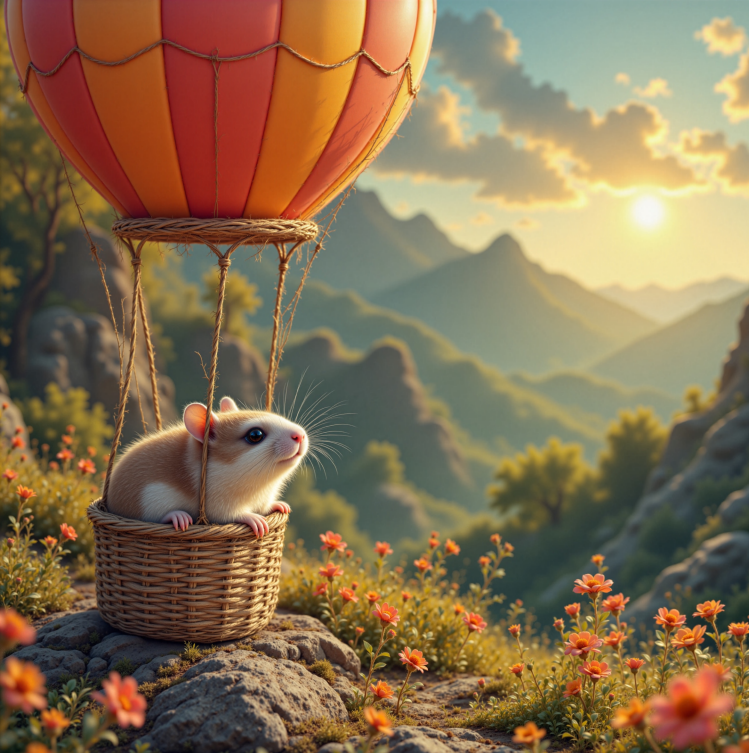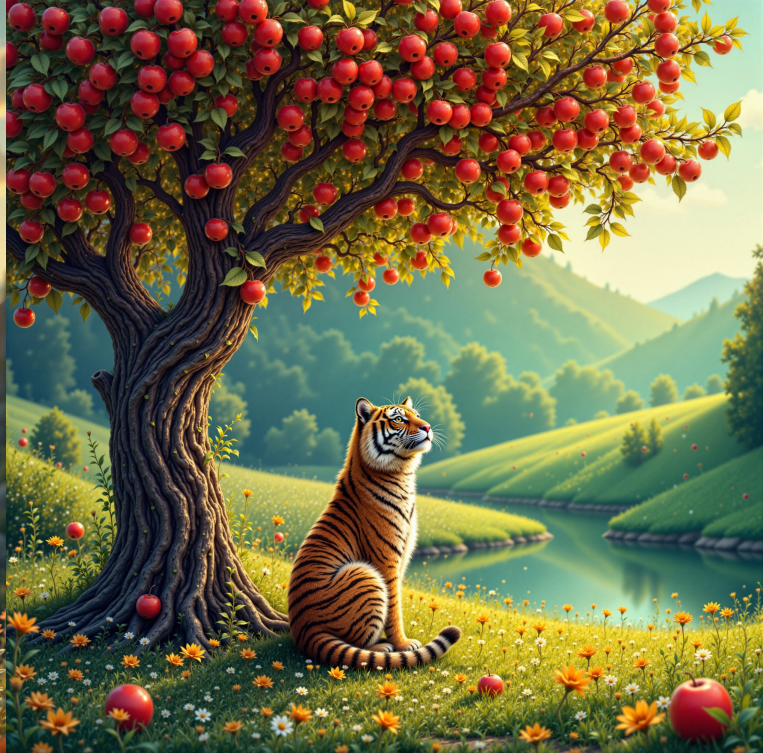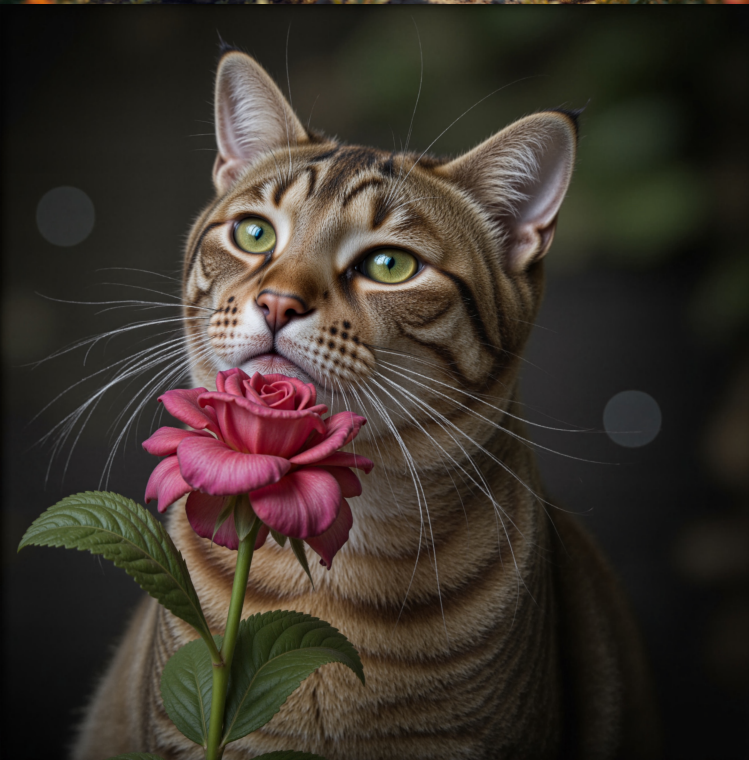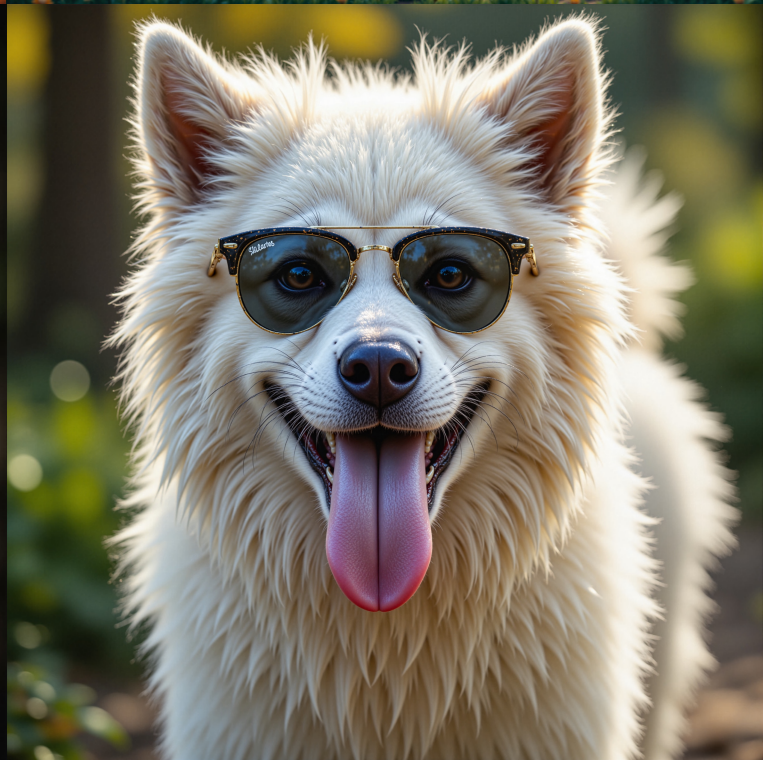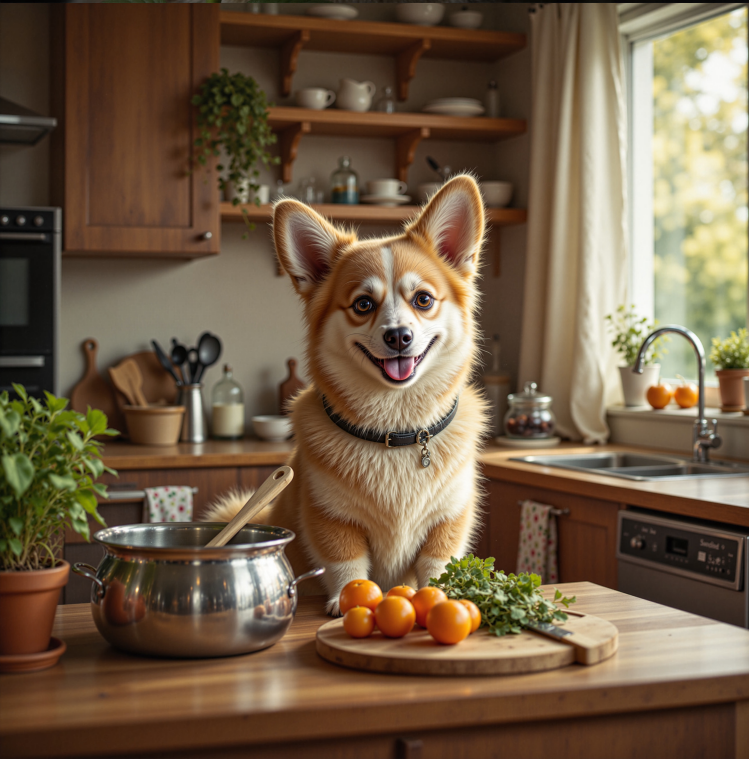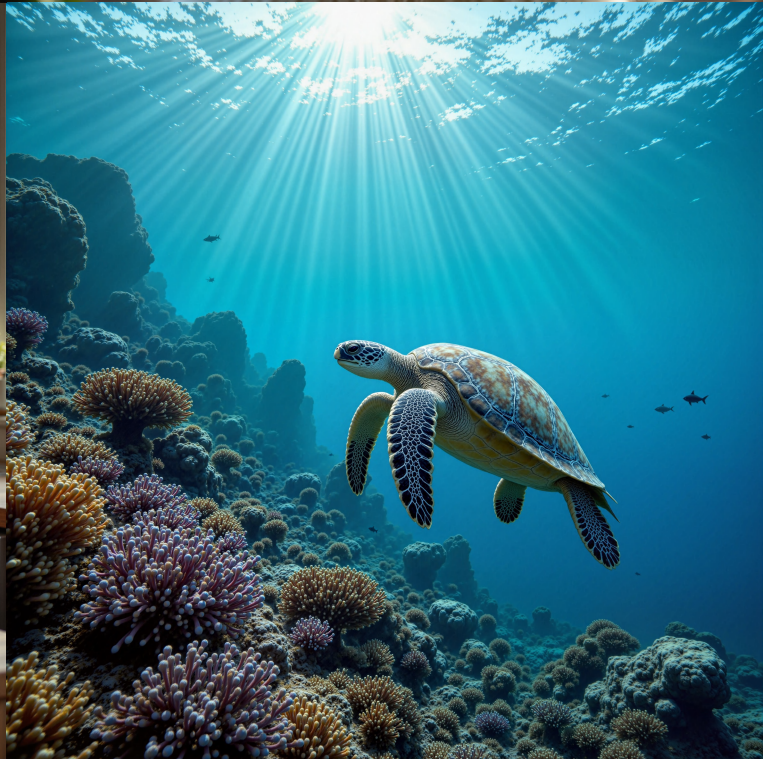

Supplement: supplementary_material [file hiflow_4K_5.pdf › additional_high_resolution_images/hiflow_4K_5.pdf]

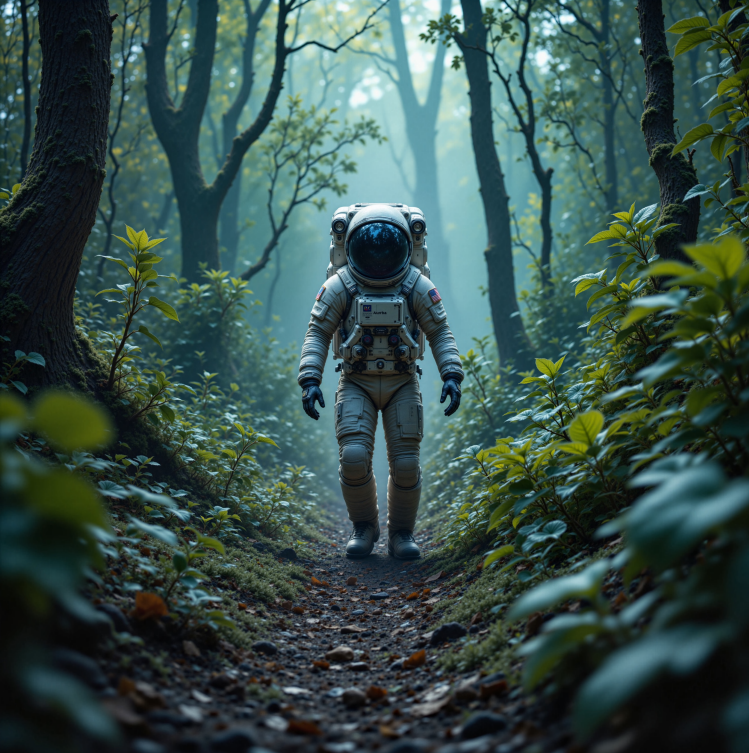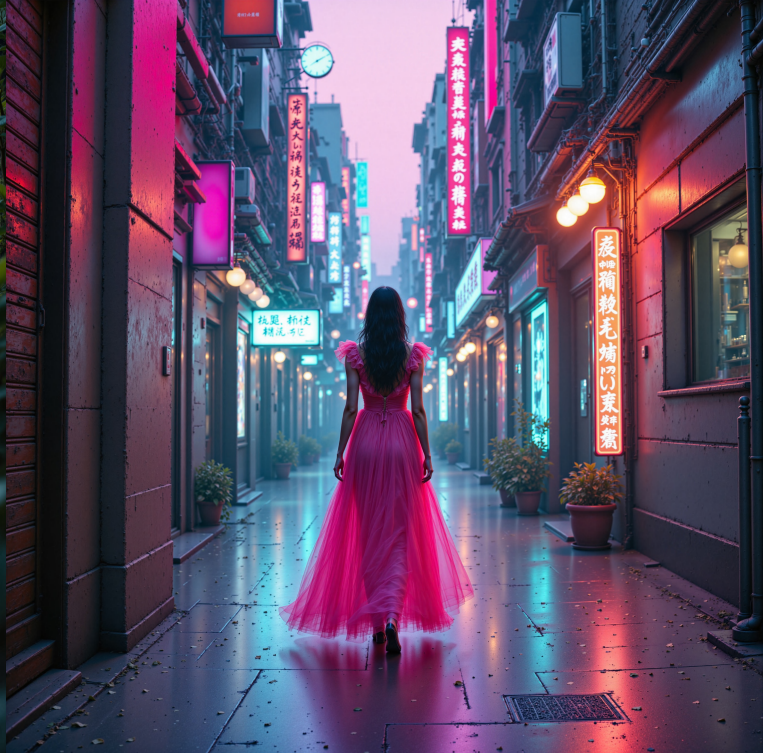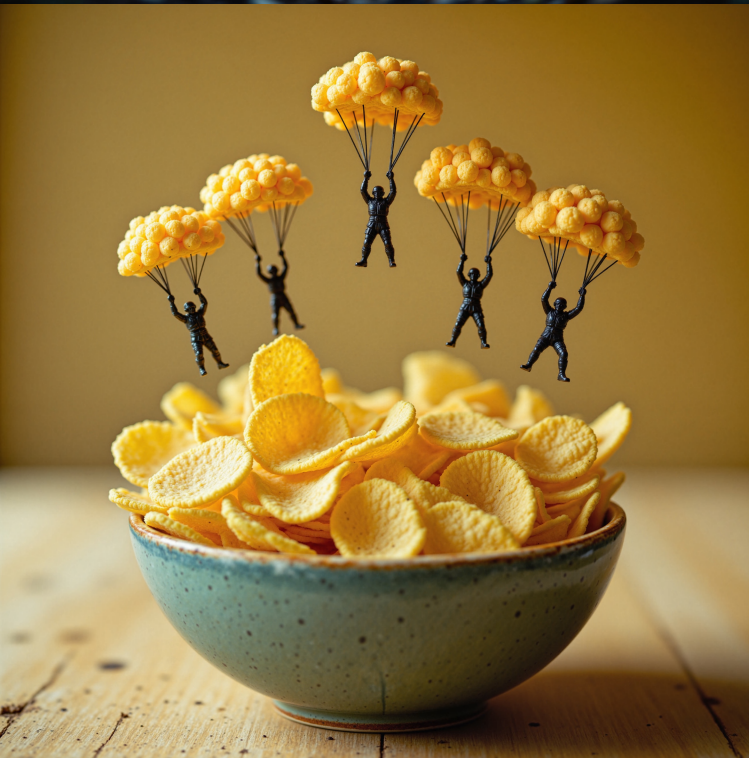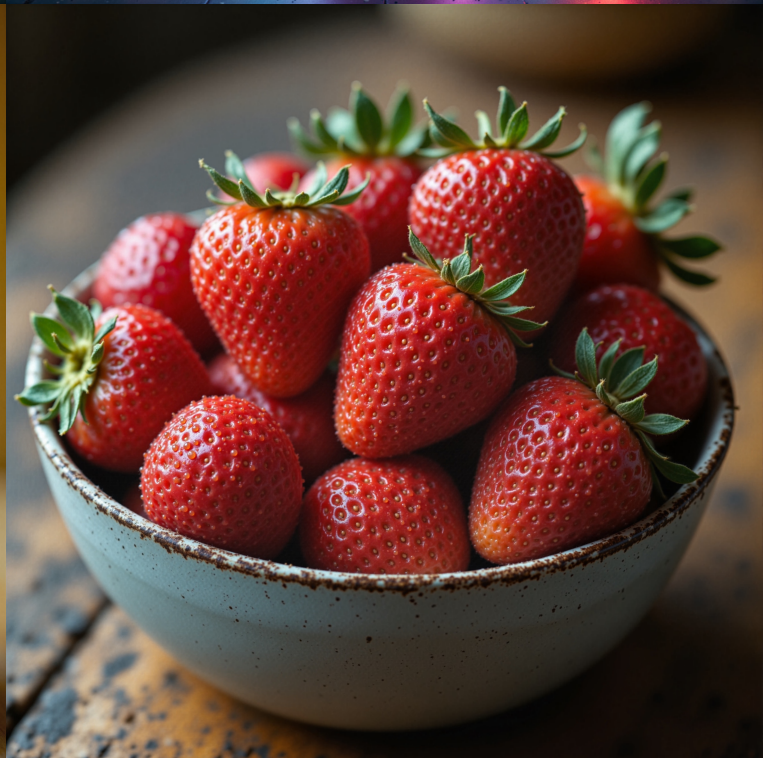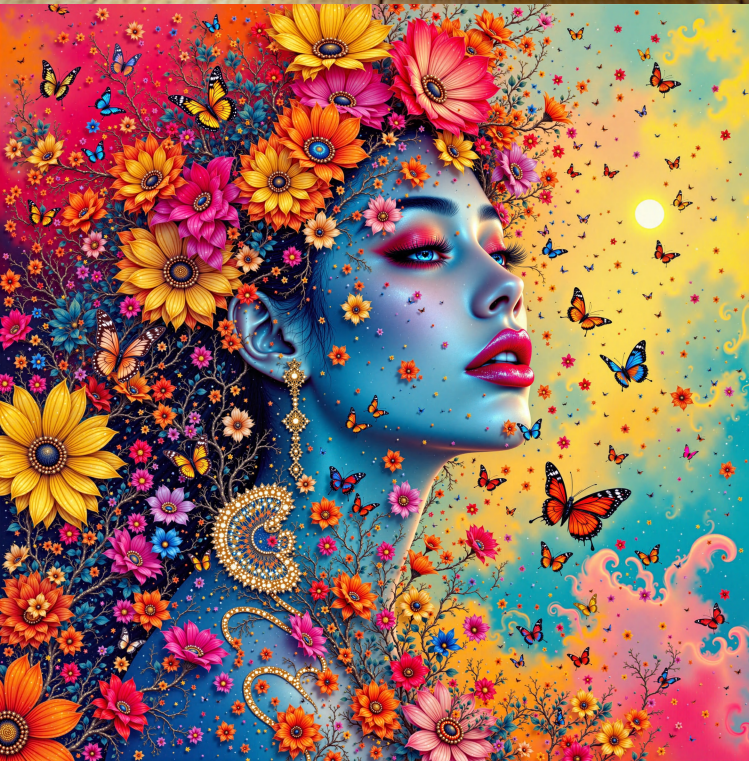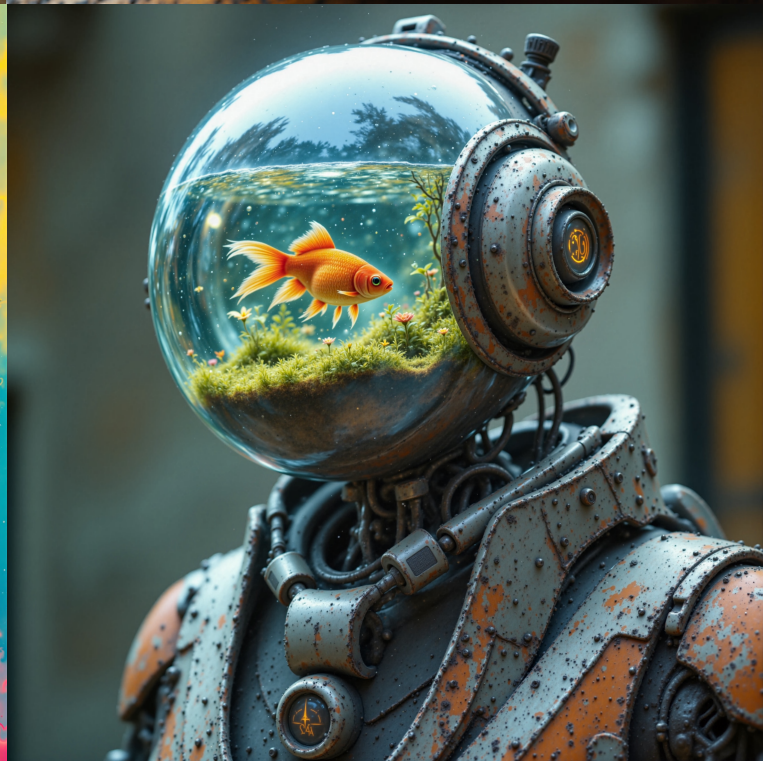

Supplement: supplementary_material [file hiflow_4K_6.pdf › additional_high_resolution_images/hiflow_4K_6.pdf]

Seed = 0

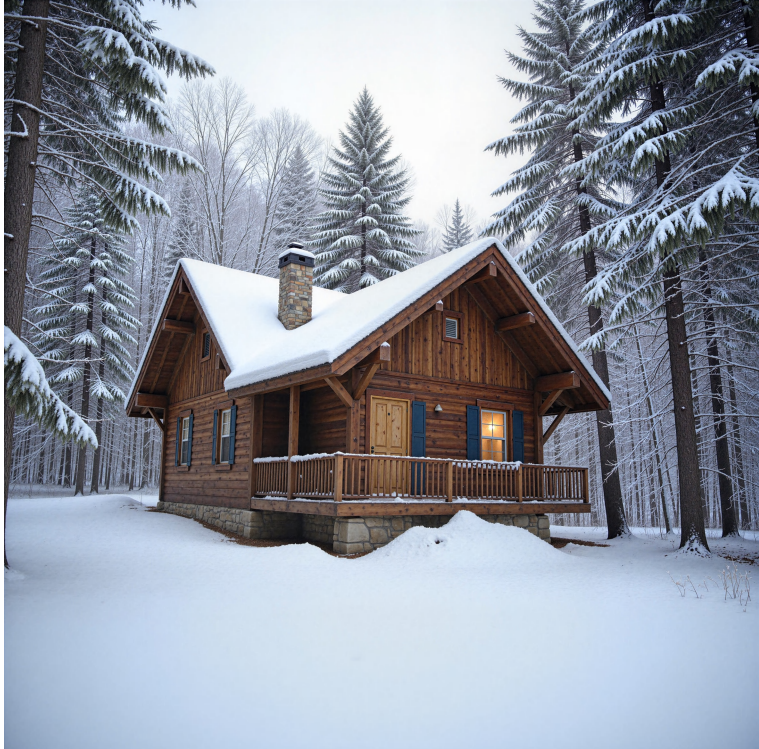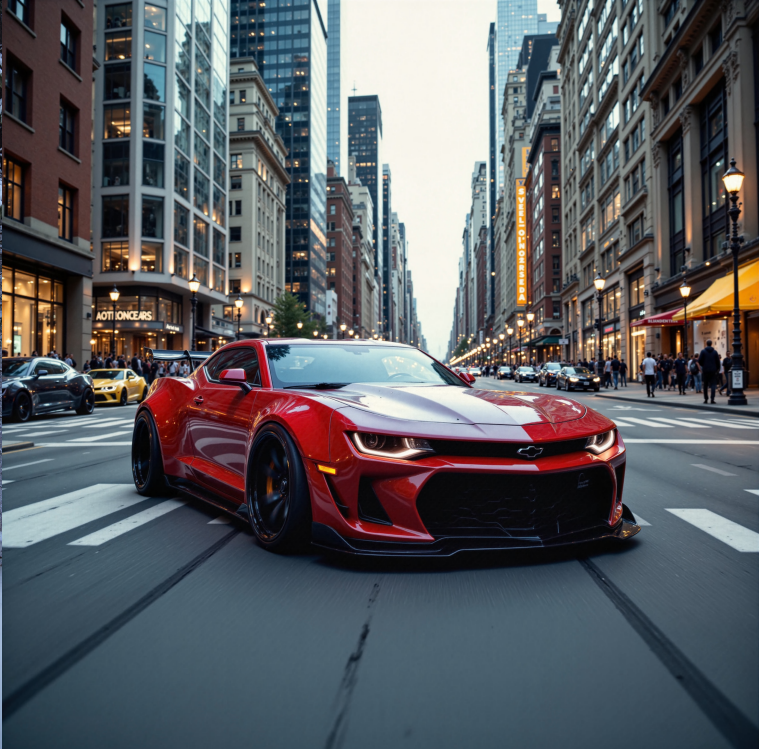

Seed = 1

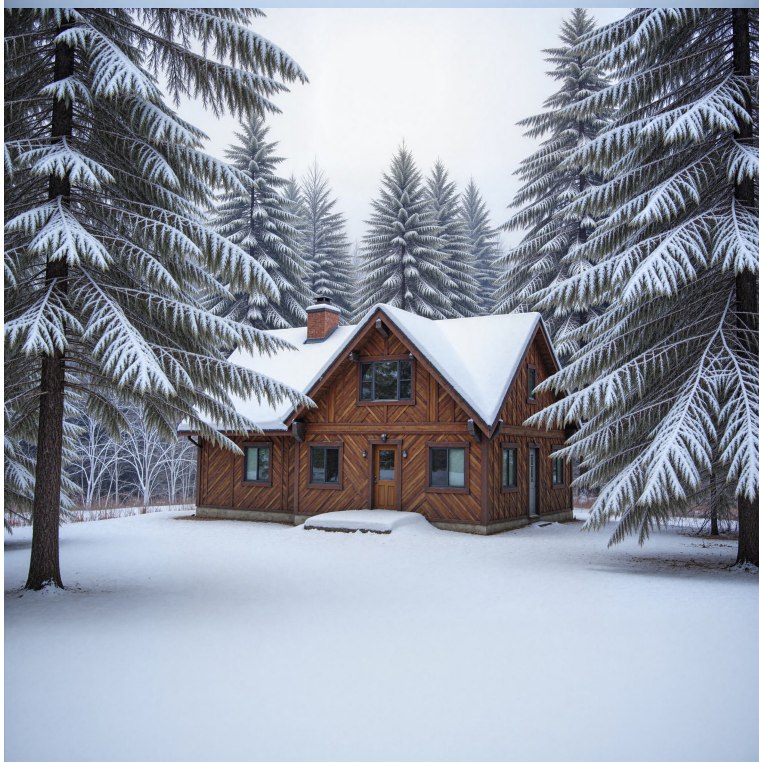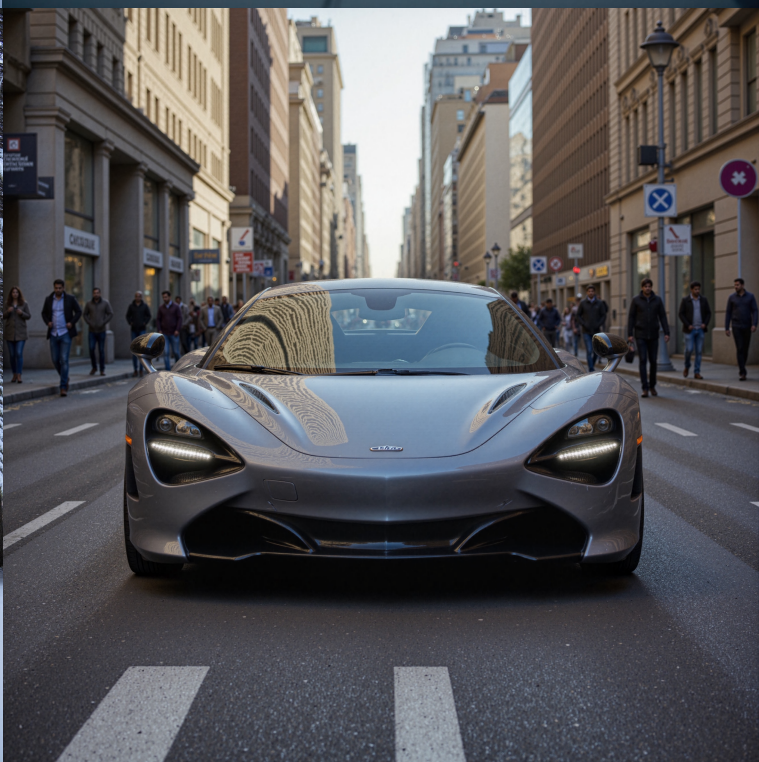

Seed = 2

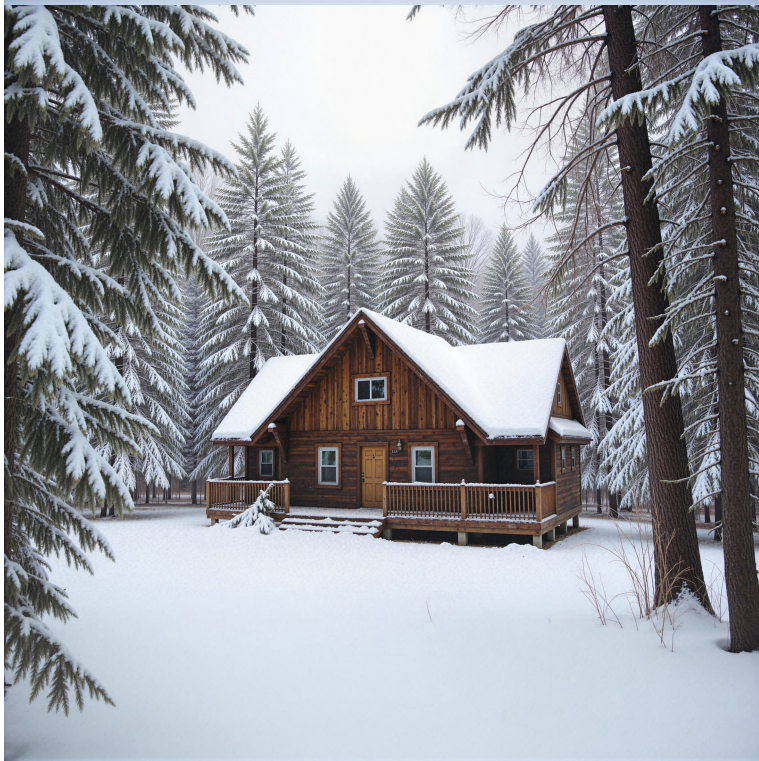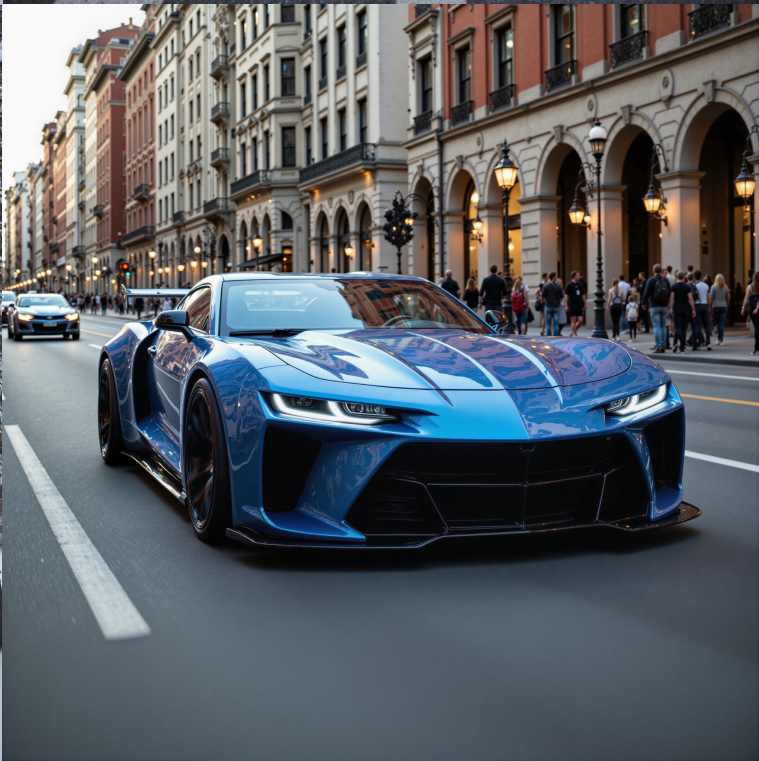

Supplement: supplementary_material [file hiflow_same_prompts_different_seeds.pdf › additional_high_resolution_images/hiflow_same_prompts_different_seeds.pdf]

SVD-Q 1024 × 2048

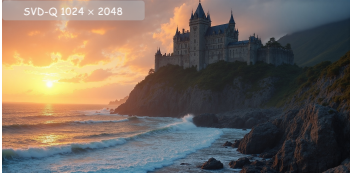

SVD-Q 1024 × 2048

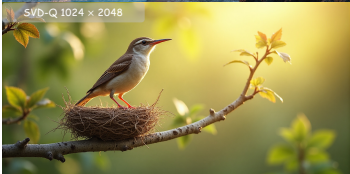

SVD-Q 2048 × 2048

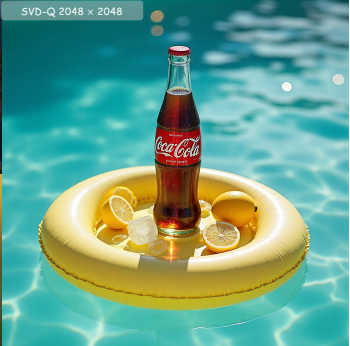

SVD-Q 2048 × 1024

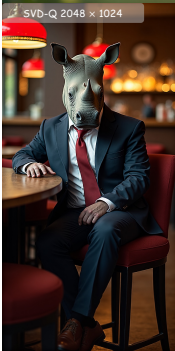

SVD-Q 2048 × 1024

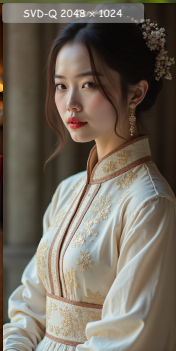

SVD-Q 2048 × 2048

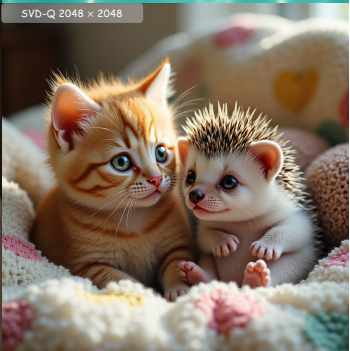

SDXL 4096 × 4096

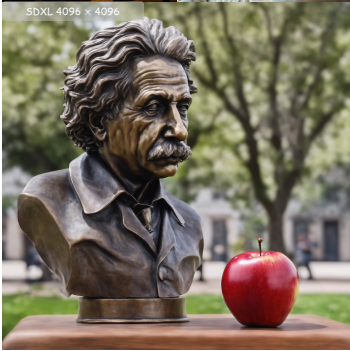

SDXL 4096 × 4096

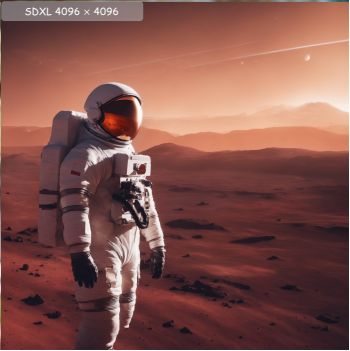

Supplement: supplementary_material [file hiflow_svdquant_and_sdxl.pdf › additional_high_resolution_images/hiflow_svdquant_and_sdxl.pdf]

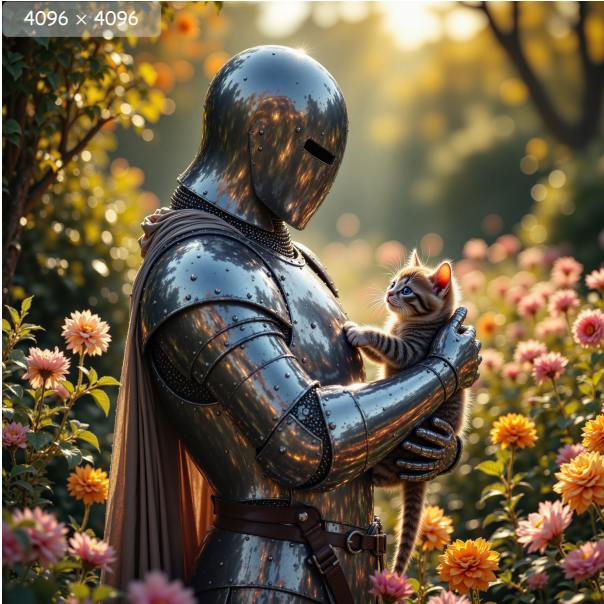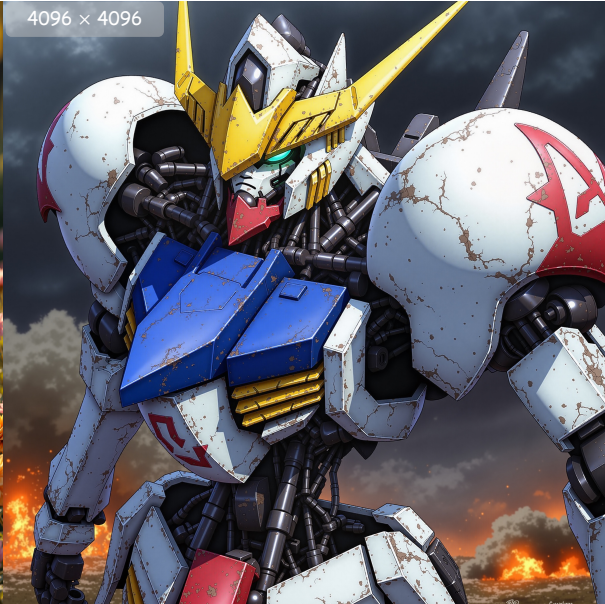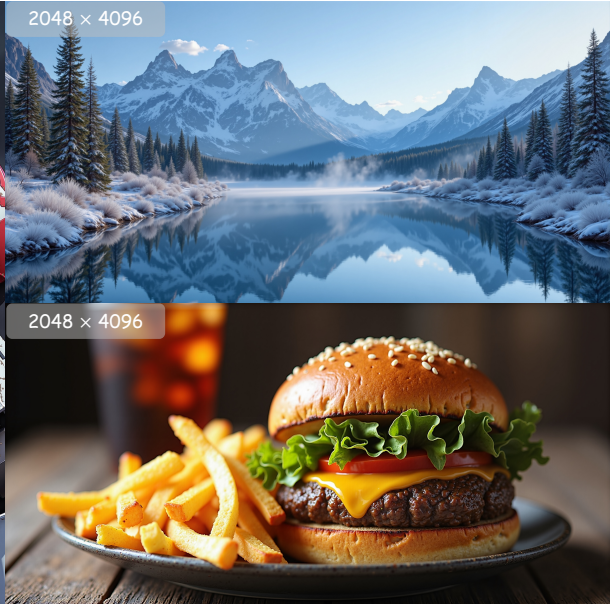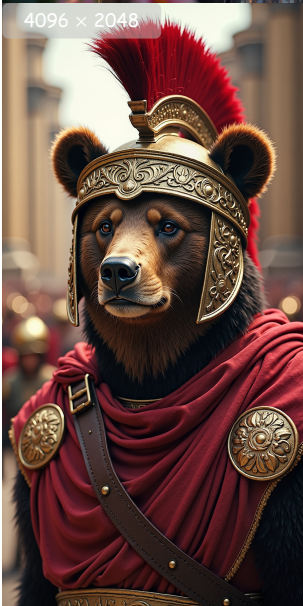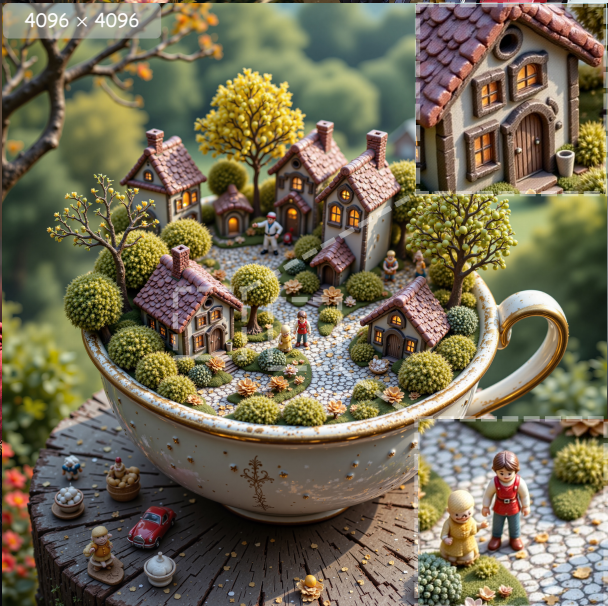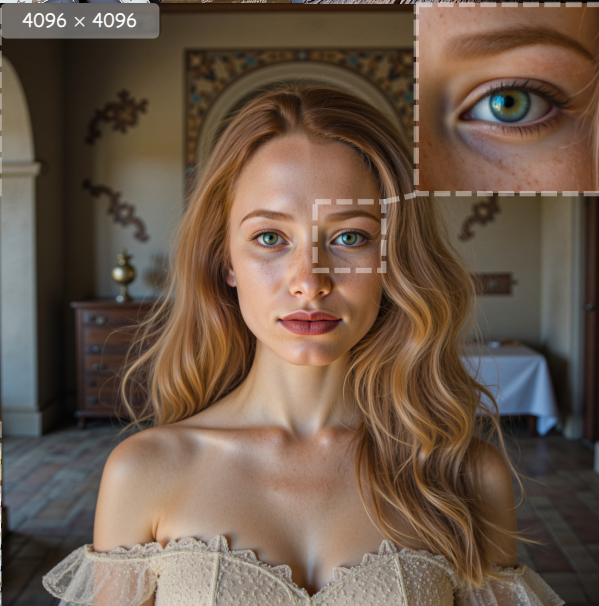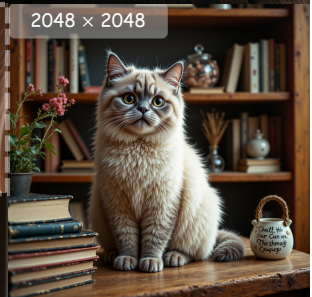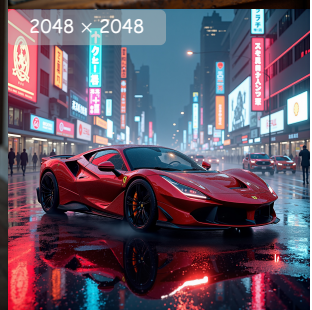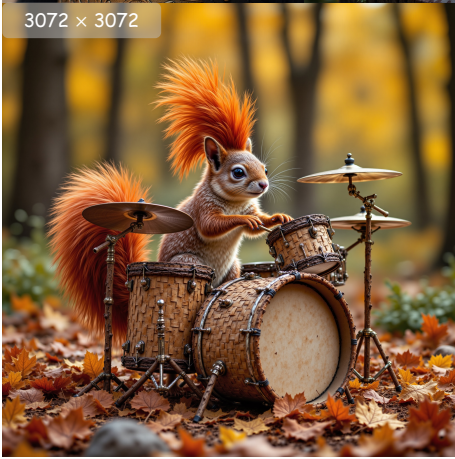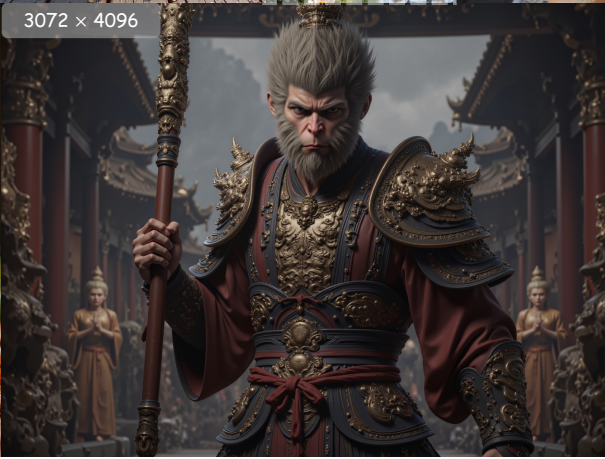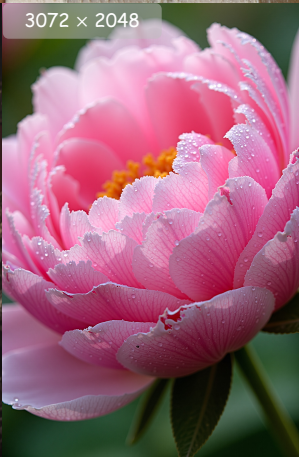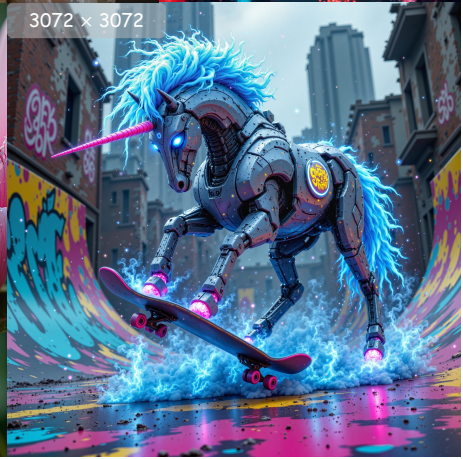

Supplement: supplementary_material [file hiflow_teaser_uncompressed.pdf › additional_high_resolution_images/hiflow_teaser_uncompressed.pdf]
